# Supplementary material for: Resistive switching behavior in α-In2Se3 nanoflakes modulated by ferroelectric polarization and interface defects
Source: Royal Society of Chemistry journal article supplement (doi:10.1039/c9ra06566k), 2019-01-01
Supplement: c9ra06566k1.pdf [file c9ra06566k1.pdf]

# Supporting Information

## Resistive switching behavior in $\alpha$ - $\text{In}_2\text{Se}_3$ nanoflakes modulated by ferroelectric polarization and interface defects

Pengfei Hou,<sup>†,‡,&,\*</sup> Siwei Xing,<sup>†,‡,&</sup> Xin Liu,<sup>†,‡,&</sup> Cheng Chen,<sup>†,‡</sup> Xiangli Zhong,<sup>†</sup> Jinbin Wang<sup>†,\*</sup> and Xiaoping Ouyang<sup>†,\*</sup>

<sup>†</sup> Key Laboratory of Low-dimensional Materials and Application Technology, School of Materials Science and Engineering, Xiangtan University, Hunan Xiangtan 411105, China

<sup>‡</sup> Science and Technology on Reliability Physics and Application Technology of Electronic Component Laboratory, Guangdong Guangzhou 510610, China

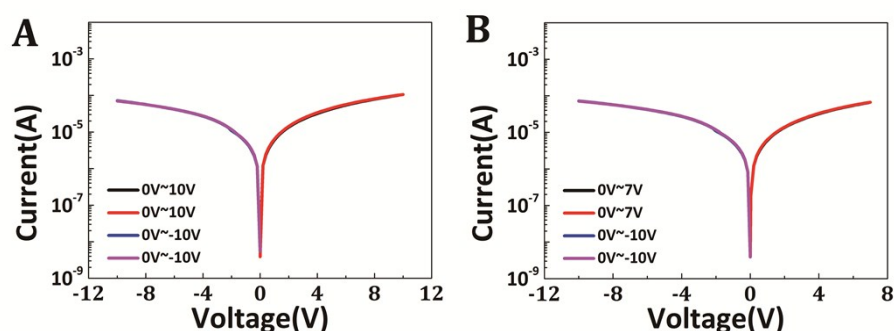

Figure R1. Current of Pt/ $\alpha$ - $\text{In}_2\text{Se}_3$ /Pt device at various applied voltage in dark.

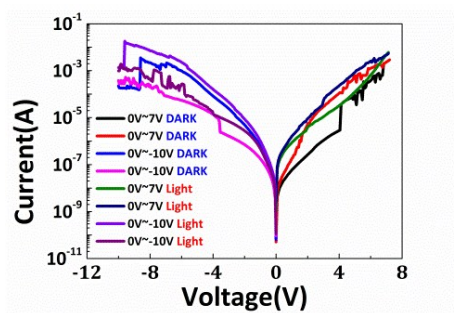

Figure R3. I-V curves under dark and light illumination.

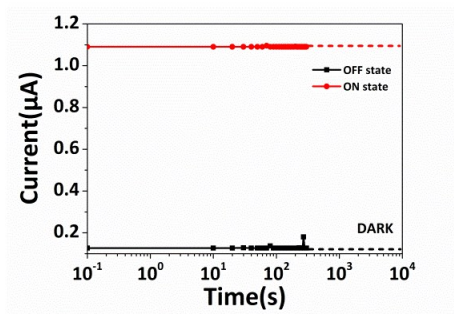

Figure R2. Current of Pt/ $\alpha$ - $\text{In}_2\text{Se}_3$ /Pt device as a function of time in dark.
